# Supplementary material for: Surface properties modulate protein corona formation and determine cellular uptake and cytotoxicity of silver nanoparticles
Source: Royal Society of Chemistry journal article supplement (doi:10.1039/d0nr08259g), 2021-01-01
Supplement: d0nr08259g1.pdf [file d0nr08259g1.pdf]

Electronic supplementary information (ESI)

## **Surface properties modulate protein corona formation and determine cellular uptake and cytotoxicity of silver nanoparticles**

Marianna Barbalinardo,<sup>a</sup> Jessika Bertacchini,<sup>b</sup> Linda Bergamini,<sup>c</sup> Maria Sara Magarò,<sup>b</sup> Luca Ortolani,<sup>d</sup> Alessandra Sanson,<sup>c</sup> Carla Palumbo,<sup>b</sup> Massimiliano Cavallini<sup>a</sup> and Denis Gentili<sup>a\*</sup>

a) Consiglio Nazionale delle Ricerche, Istituto per lo Studio dei Materiali Nanostrutturati (CNR-ISMN), via P. Gobetti 101, 40129 Bologna (Italy)

b) Department of Biomedical, Metabolic and Neural Sciences, Section of Human Morphology, University of Modena and Reggio Emilia, Via del Pozzo 71, 41124 Modena (Italy)

c) Consiglio Nazionale delle Ricerche, Istituto di Scienza e Tecnologia dei Materiali Ceramici (CNR-ISTEC), via Granarolo 64, 48018 Faenza (Italy)

d) Consiglio Nazionale delle Ricerche, Istituto per la Microelettronica e Microsistemi (CNR-IMM), via P. Gobetti 101, 40129 Bologna (Italy)

\*denis.gentili@cnr.it

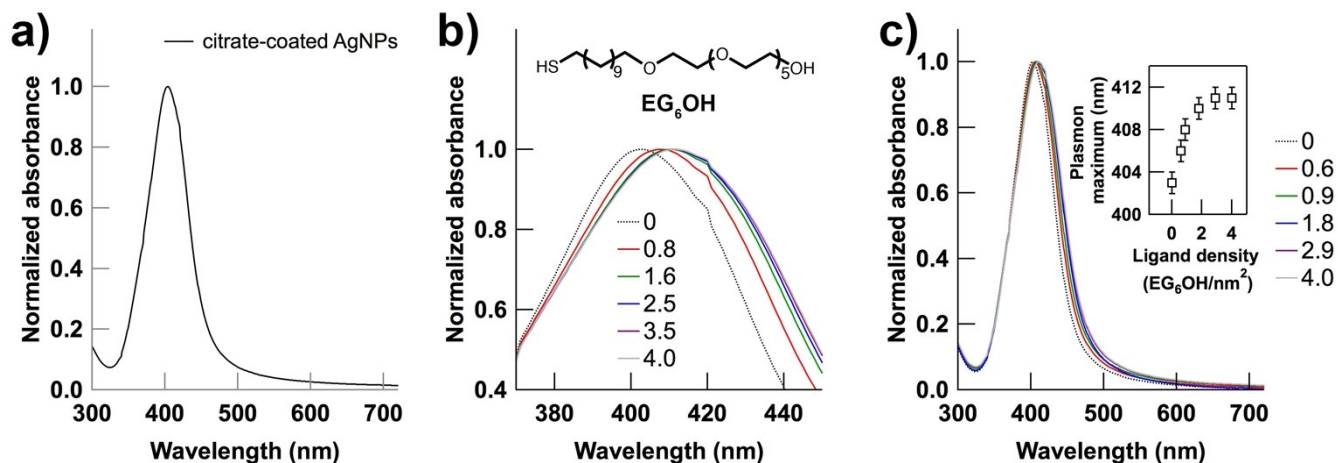

**Fig. S1** (a) UV-Vis absorption spectra of citrate-coated AgNPs in sodium citrate (2 mM). (b) Zoom-in of UV-Vis absorption spectra show in Fig. 1c and molecular structure of EG<sub>6</sub>OH. (c) UV-Vis absorption spectra of AgNPs in sodium citrate (2 mM) as a function of EG<sub>6</sub>OH density of a different batch compared to Fig. 1c (Inset: Dependence of the plasmon band maximum on the EG<sub>6</sub>OH density).

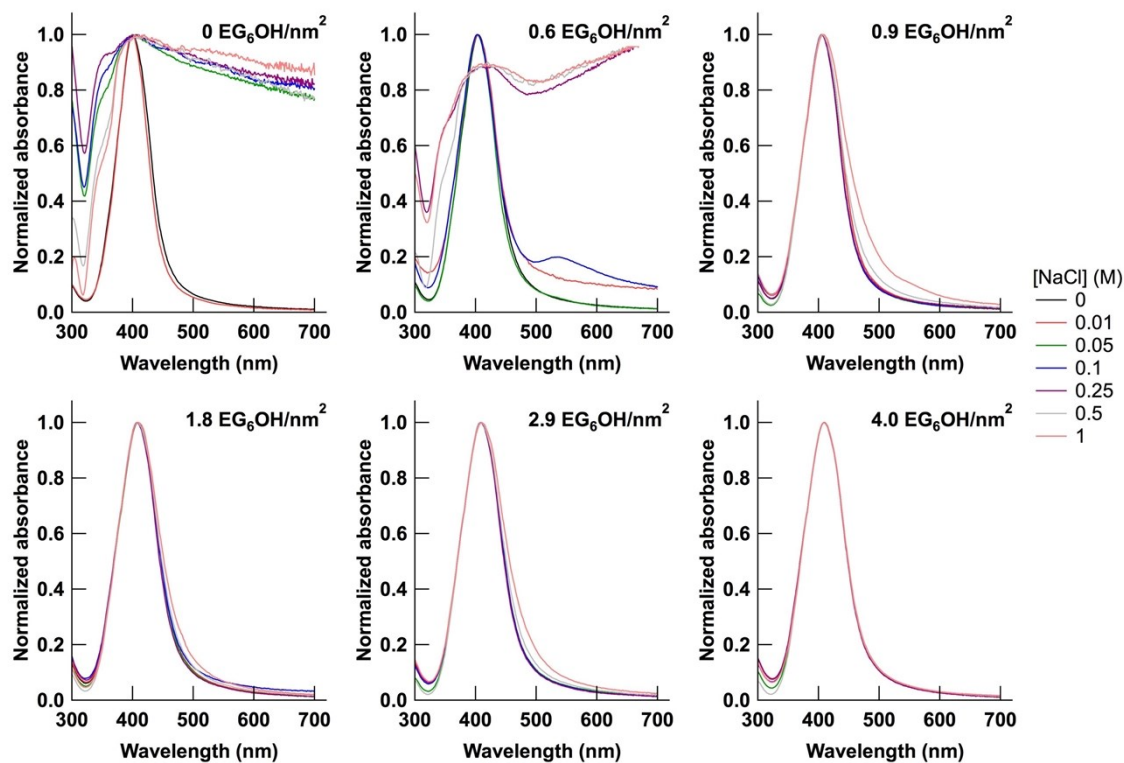

**Fig. S2** UV/Vis absorption spectra of AgNPs with different EG<sub>6</sub>OH grafting density as a function of sodium chloride addition (0-1 M).

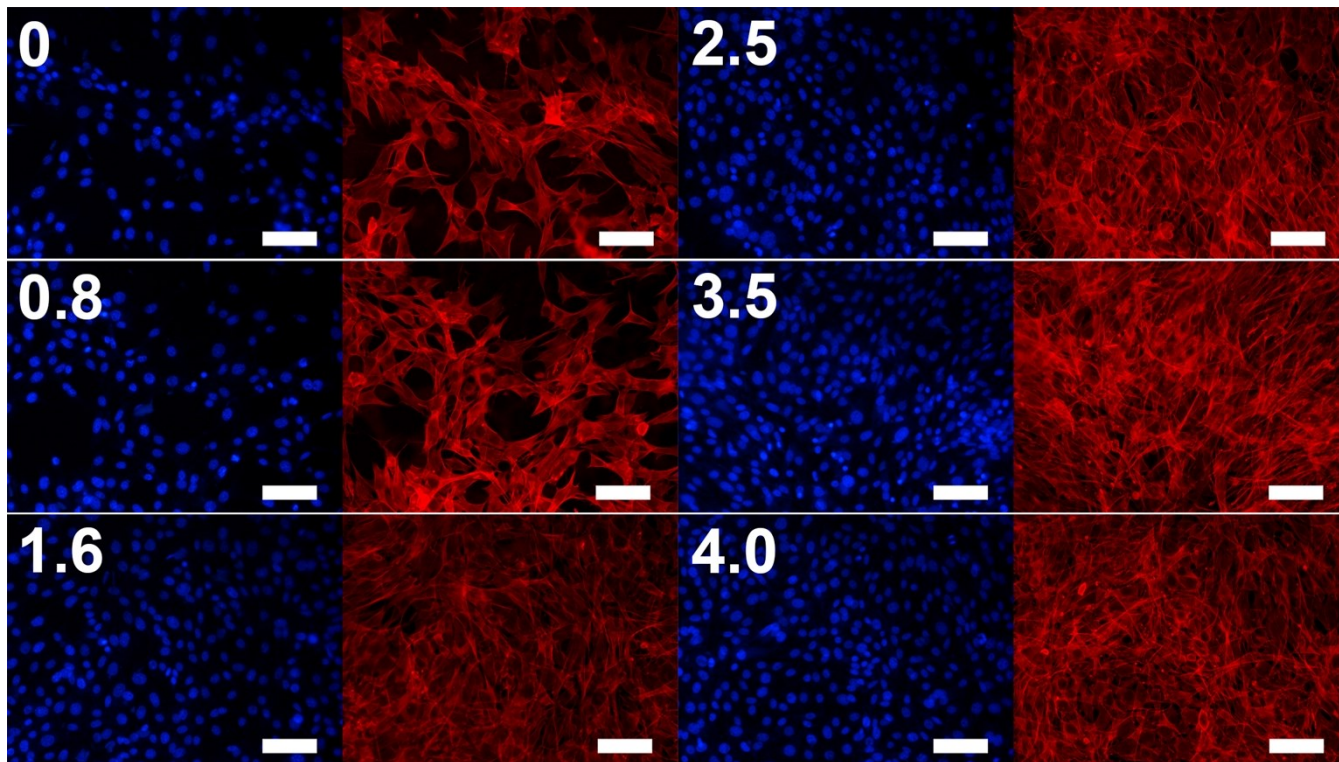

**Fig. S3** Non-merged fluorescence micrographs of cells labeled specifically for actin (red, right) and the nucleus (blue, left) after 24 h of incubation with 40  $\mu\text{g/mL}$  of AgNPs as a function ligand density ( $\text{EG}_6\text{OH}/\text{nm}^2$ ) (Scale bar: 100  $\mu\text{m}$ ).

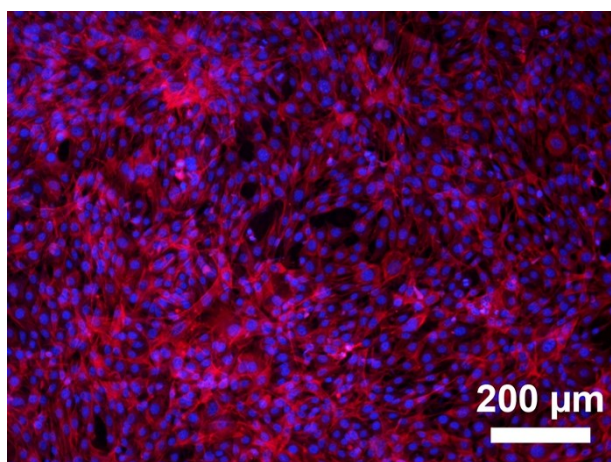

**Fig. S4** Fluorescence micrographs of NIH-3T3 cells labeled specifically for actin (red) and the nucleus (blue) after 24h of incubation with vehicle solution (control).

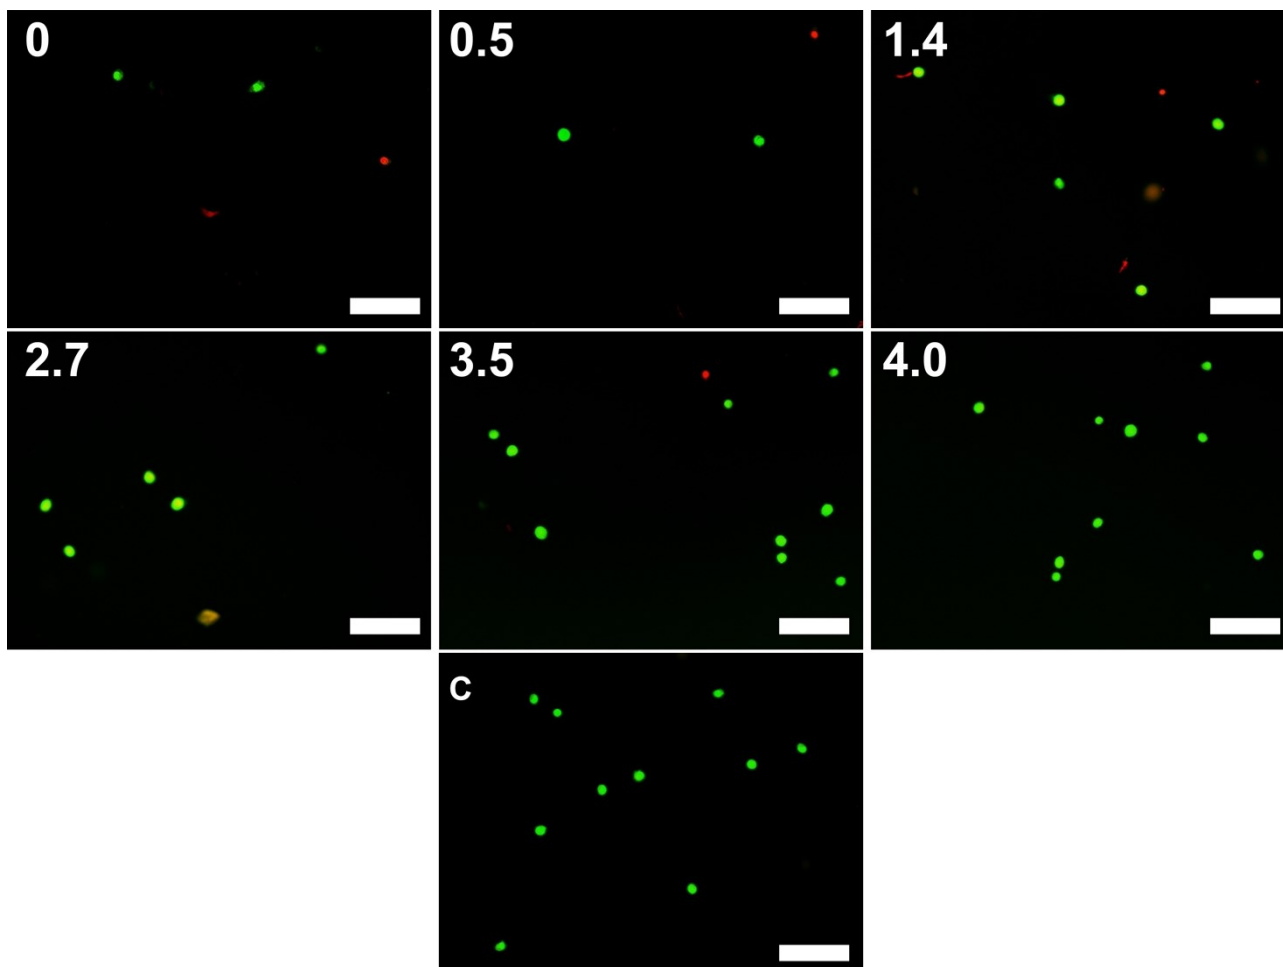

**Fig. S5** Morphological observation of NIH-3T3 cells treated with 40  $\mu\text{g}/\text{mL}$  of AgNPs or vehicle solution (c) for 48h after AO/EB staining as a function ligand density ( $\text{EG}_6\text{OH}/\text{nm}^2$ ).

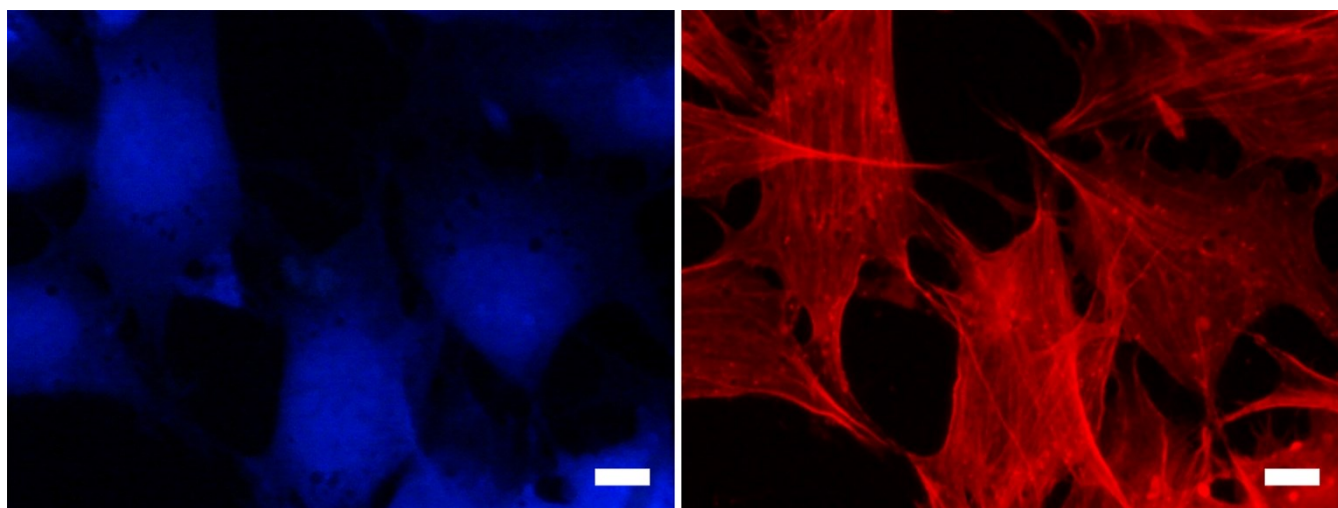

**Fig. S6** Non-merged fluorescence micrographs of cells labeled specifically for actin (red, right) and the nucleus (blue, left) after 24 h of incubation with 40  $\mu\text{g}/\text{mL}$  of AgNPs with ligand density 0  $\text{EG}_6\text{OH}/\text{nm}^2$  (Scale bar: 10  $\mu\text{m}$ ).

**Table S1:** Physicochemical properties of nanoparticles before and after serum exposure

| Ligand density<br>(EG <sub>6</sub> OH/nm <sup>2</sup> ) | Hydrodynamic diameter (nm) |                      | Zeta potential (mV)   |                      |
|---------------------------------------------------------|----------------------------|----------------------|-----------------------|----------------------|
|                                                         | Before serum exposure      | After serum exposure | Before serum exposure | After serum exposure |
| 0                                                       | 26±1                       | 88±5                 | -40±2                 | -29±1                |
| 0.7                                                     | 28±1                       | 50±1                 | -37±2                 | -29±1                |
| 1.5                                                     | 27±1                       | 37±1                 | -34±2                 | -30±1                |
| 2.2                                                     | 29±1                       | 33±2                 | -32±2                 | -30±2                |
| 3.0                                                     | 28±1                       | 34±1                 | -32±1                 | -28±1                |
| 3.7                                                     | 30±1                       | 34±1                 | -29±1                 | -29±3                |
| 4.0                                                     | 30±1                       | 32±1                 | -29±1                 | -30±2                |

Data are presented as mean ± standard deviation (SD)

**Table S2:** List of all proteins identified by LC-MS/MS in the corona of citrate-coated AgNPs following exposure to the cell growth media.

| Abbreviation | Description                                | MW (kDa) | emPAI | % mol |
|--------------|--------------------------------------------|----------|-------|-------|
| ALBU_BOVIN   | Serum albumin                              | 71.244   | 2.3   | 21.5  |
| APOE_BOVIN   | Apolipoprotein E                           | 36.015   | 1.76  | 16.4  |
| HBA_BOVIN    | Hemoglobin subunit alpha                   | 15.175   | 1.11  | 10.4  |
| ANT3_BOVIN   | Antithrombin-III                           | 52.827   | 0.62  | 5.8   |
| FETUA_BOVIN  | Alpha-2-HS-glycoprotein                    | 39.193   | 0.61  | 5.7   |
| TSP1_BOVIN   | Thrombospondin-1                           | 133.442  | 0.43  | 4.0   |
| HBBF_BOVIN   | Hemoglobin fetal subunit beta              | 15.963   | 0.41  | 3.8   |
| GELS_BOVIN   | Gelsolin                                   | 80.966   | 0.39  | 3.6   |
| C1QB_BOVIN   | Complement C1q subcomponent subunit B      | 26.611   | 0.37  | 3.5   |
| APOA1_BOVIN  | Apolipoprotein A-I                         | 30.258   | 0.32  | 3.0   |
| K1C17_BOVIN  | Keratin, type I cytoskeletal 17            | 48.967   | 0.31  | 2.9   |
| A1AT_BOVIN   | Alpha-1-antitrypsin                        | 46.417   | 0.26  | 2.4   |
| DDBX_BOVIN   | Dihydrodiol dehydrogenase                  | 37.046   | 0.26  | 2.4   |
| THRB_BOVIN   | Prothrombin                                | 71.886   | 0.25  | 2.3   |
| PLMN_BOVIN   | Plasminogen                                | 93.894   | 0.13  | 1.2   |
| F13A_BOVIN   | Coagulation factor XIII A chain (Fragment) | 22.844   | 0.13  | 1.2   |
| CO3_BOVIN    | Complement C3                              | 188.675  | 0.11  | 1.0   |
| C1QA_BOVIN   | Complement C1q subcomponent subunit A      | 26.014   | 0.11  | 1.0   |
| GSTA2_BOVIN  | Glutathione S-transferase A2               | 25.814   | 0.11  | 1.0   |
| CO4_BOVIN    | Complement C4 (Fragments)                  | 103.018  | 0.09  | 0.8   |
| K2C5_BOVIN   | Keratin, type II cytoskeletal 5            | 63.069   | 0.09  | 0.8   |
| RGN_BOVIN    | Regucalcin                                 | 33.857   | 0.09  | 0.8   |
| FA5_BOVIN    | Coagulation factor V                       | 249.912  | 0.08  | 0.7   |
| HSP7C_BOVIN  | Heat shock cognate 71 kDa protein          | 71.424   | 0.08  | 0.7   |
| LDHA_BOVIN   | L-lactate dehydrogenase A chain            | 36.916   | 0.08  | 0.7   |
| ALDOB_BOVIN  | Fructose-bisphosphate aldolase B           | 39.917   | 0.07  | 0.7   |
| CBPB2_BOVIN  | Carboxypeptidase B2                        | 49.247   | 0.06  | 0.6   |
| HS71A_BOVIN  | Heat shock 70 kDa protein 1A               | 70.259   | 0.04  | 0.4   |
| CO7_BOVIN    | Complement component C7                    | 96.223   | 0.03  | 0.3   |



**Table S3:** List of all proteins identified by LC-MS/MS in bands 2, 3, 4, 6, and 7 in Figure 2c of the corona of citrate-coated AgNPs following exposure to the cell growth media.

| Abbreviation | Description                                | MW (kDa) | emPAI | % mol |
|--------------|--------------------------------------------|----------|-------|-------|
| APOE_BOVIN   | Apolipoprotein E                           | 36.015   | 1.76  | 19.8  |
| ALBU_BOVIN   | Serum albumin                              | 71.244   | 1.35  | 15.2  |
| HBA_BOVIN    | Hemoglobin subunit alpha                   | 15.175   | 1.11  | 12.5  |
| ANT3_BOVIN   | Antithrombin-III                           | 52.827   | 0.62  | 7.0   |
| TSP1_BOVIN   | Thrombospondin-1                           | 133.442  | 0.43  | 4.8   |
| HBBF_BOVIN   | Hemoglobin fetal subunit beta              | 15.963   | 0.41  | 4.6   |
| GELS_BOVIN   | Gelsolin                                   | 80.966   | 0.39  | 4.4   |
| C1QB_BOVIN   | Complement C1q subcomponent subunit B      | 26.611   | 0.37  | 4.2   |
| APOA1_BOVIN  | Apolipoprotein A-I                         | 30.258   | 0.32  | 3.6   |
| K1C17_BOVIN  | Keratin, type I cytoskeletal 17            | 48.967   | 0.31  | 3.5   |
| DDBX_BOVIN   | Dihydrodiol dehydrogenase                  | 37.046   | 0.26  | 2.9   |
| THRB_BOVIN   | Prothrombin                                | 71.886   | 0.25  | 2.8   |
| PLMN_BOVIN   | Plasminogen                                | 93.894   | 0.13  | 1.5   |
| F13A_BOVIN   | Coagulation factor XIII A chain (Fragment) | 22.844   | 0.13  | 1.5   |
| C1QA_BOVIN   | Complement C1q subcomponent subunit A      | 26.014   | 0.11  | 1.2   |
| GSTA2_BOVIN  | Glutathione S-transferase A2               | 25.814   | 0.11  | 1.2   |
| CO4_BOVIN    | Complement C4 (Fragments)                  | 103.018  | 0.09  | 1.0   |
| K2C5_BOVIN   | Keratin, type II cytoskeletal 5            | 63.069   | 0.09  | 1.0   |
| RGN_BOVIN    | Regucalcin                                 | 33.857   | 0.09  | 1.0   |
| FA5_BOVIN    | Coagulation factor V                       | 249.912  | 0.08  | 0.9   |
| HSP7C_BOVIN  | Heat shock cognate 71 kDa protein          | 71.424   | 0.08  | 0.9   |
| LDHA_BOVIN   | L-lactate dehydrogenase A chain            | 36.916   | 0.08  | 0.9   |
| ALDOB_BOVIN  | Fructose-bisphosphate aldolase B           | 39.917   | 0.07  | 0.8   |
| FETUA_BOVIN  | Alpha-2-HS-glycoprotein                    | 39.193   | 0.07  | 0.8   |
| CBPB2_BOVIN  | Carboxypeptidase B2                        | 49.247   | 0.06  | 0.7   |
| A1AT_BOVIN   | Alpha-1-antitrypsin                        | 46.417   | 0.06  | 0.7   |
| HS71A_BOVIN  | Heat shock 70 kDa protein 1A               | 70.5     | 0.04  | 0.4   |
| CO7_BOVIN    | Complement component C7                    | 96.223   | 0.03  | 0.3   |

**Table S4:** List of all proteins identified by LC-MS/MS in band 6 in Figure 2c of the corona of citrate-coated AgNPs following exposure to the cell growth media.

| Abbreviation | Description                      | MW (kDa) | emPAI | % mol |
|--------------|----------------------------------|----------|-------|-------|
| APOE_BOVIN   | Apolipoprotein E                 | 36.015   | 1.76  | 58.5  |
| DDBX_BOVIN   | Dihydrodiol dehydrogenase        | 37.046   | 0.26  | 8.6   |
| HBA_BOVIN    | Hemoglobin subunit alpha         | 15.175   | 0.20  | 6.6   |
| K1C17_BOVIN  | Keratin, type I cytoskeletal 17  | 48.967   | 0.19  | 6.3   |
| THRB_BOVIN   | Prothrombin                      | 71.886   | 0.17  | 5.6   |
| RGN_BOVIN    | Regucalcin                       | 33.857   | 0.09  | 3.0   |
| ALBU_BOVIN   | Serum albumin                    | 71.244   | 0.08  | 2.7   |
| LDHA_BOVIN   | L-lactate dehydrogenase A chain  | 36.916   | 0.08  | 2.7   |
| ALDOB_BOVIN  | Fructose-bisphosphate aldolase B | 39.917   | 0.07  | 2.3   |
| CBPB2_BOVIN  | Carboxypeptidase B2              | 49.247   | 0.06  | 2.0   |
| GELS_BOVIN   | Gelsolin                         | 80.966   | 0.04  | 1.3   |
| FA5_BOVIN    | Coagulation factor V             | 249.912  | 0.01  | 0.3   |

**Table S5:** NIH-3T3 nuclei per unit area after 24 h of incubation with 40  $\mu\text{g/mL}$  of AgNPs as a function ligand density ( $\text{EG}_6\text{OH}/\text{nm}^2$ ).

| Ligand density ( $\text{EG}_6\text{OH}/\text{nm}^2$ ) | Cell nuclei density (n.ro/ $\text{mm}^2$ ) |
|-------------------------------------------------------|--------------------------------------------|
| 0                                                     | 493 $\pm$ 53                               |
| 0.8                                                   | 705 $\pm$ 86                               |
| 1.6                                                   | 994 $\pm$ 105                              |
| 2.5                                                   | 1084 $\pm$ 174                             |
| 3.5                                                   | 1280 $\pm$ 102                             |
| 4.0                                                   | 1485 $\pm$ 187                             |
| Control (vehicle solution)                            | 1537 $\pm$ 50                              |

Data are presented as mean  $\pm$  standard deviation (SD) of at least three independent culture experiments.



**Table S6:** Percentage of viable cells, early apoptosis, late apoptosis and necrotic cells after 48 h of incubation with 40  $\mu\text{g/mL}$  of AgNPs as a function ligand density ( $\text{EG}_6\text{OH}/\text{nm}^2$ ).

| Ligand density ( $\text{EG}_6\text{OH}/\text{nm}^2$ ) | Live cells | Early apoptosis | Late apoptosis | Necrosis |
|-------------------------------------------------------|------------|-----------------|----------------|----------|
| 0                                                     | 15%        | 67%             | 7%             | 11%      |
| 0.5                                                   | 20%        | 62%             | 5%             | 13%      |
| 1.4                                                   | 30%        | 52%             | 3%             | 15%      |
| 2.7                                                   | 54%        | 35%             | 2%             | 9%       |
| 3.5                                                   | 77%        | 16%             | 2%             | 5%       |
| 4.0                                                   | 85%        | 12%             | 1%             | 2%       |
| Control (vehicle solution)                            | 96%        | 2%              | 0%             | 2%       |

Data are presented as mean of at least three independent culture experiments.
